# Supplementary material for: Retracted Article: 3D Small molecule microarray with enhanced sensitivity and immobilization capacity monitored by surface plasmon resonance imaging
Source: Royal Society of Chemistry journal article supplement (doi:10.1039/c4ra07306a), 2014-01-01
Supplement: c4ra07306a1.pdf [file c4ra07306a1.pdf]

## Supporting Information for:

3D Small molecule microarray with enhanced sensitivity and immobilization capacity monitored by surface plasmon resonance imaging

Vikramjeet Singh<sup>a, b</sup>, Amita Nand<sup>a, b</sup>, Zhiqiang Cheng<sup>a, b</sup>, Mo Yang<sup>a, b</sup> and Jinsong Zhu<sup>a, b, \*</sup>,

<sup>a</sup>National Center for Nanoscience and Technology, Beijing 100190, People's Republic of China

<sup>b</sup>University of Chinese Academy of Sciences, 100049, Beijing, People's Republic of China

<sup>c</sup>Department of Chemistry, Tsinghua University, Beijing 100084, People's Republic of China

\*To whom correspondence should be addressed.

Phone: +86(10)82545588

E-mail: [jjzhu@nanoctr.cn](mailto:jjzhu@nanoctr.cn)

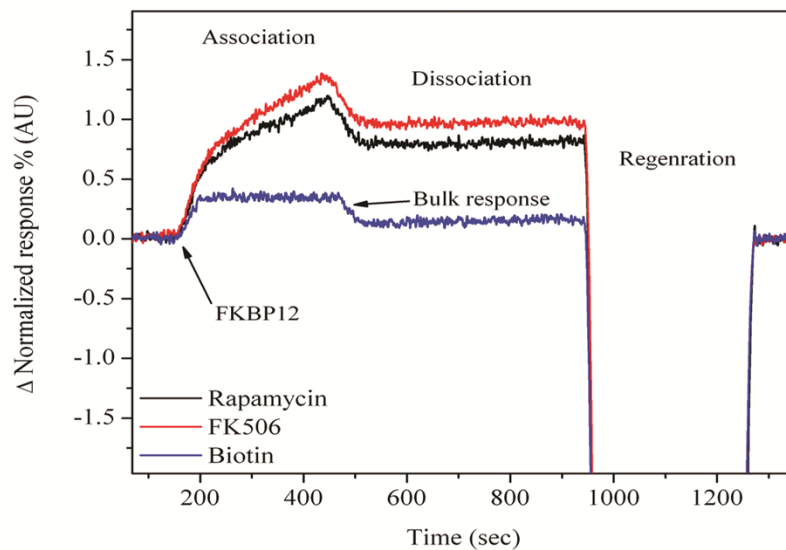

**Figure S-1:** SPR imaging graph showing a complete cycle of FKBP12 protein (100nM) including association, dissociation and regeneration step. Data here is without subtraction of negative control.

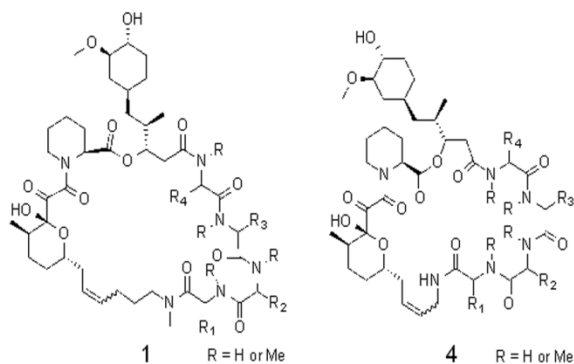

| Compound | Building blocks |                |                |                |
|----------|-----------------|----------------|----------------|----------------|
|          | R <sub>1</sub>  | R <sub>2</sub> | R <sub>3</sub> | R <sub>4</sub> |
| 1A       | Sar             | Phe            | Val            | Ala            |
| 1B       | Leu             | D-Phe          | Pro            | N-Me-Val       |
| 1C       | D-Val           | N-Me-Ile       | Gly            | N-Me-Ala       |
| 4A       | Sar             | Phe            | Val            | Ala            |
| 4B       | Leu             | D-Phe          | Pro            | N-Me-Val       |
| 4C       | D-Val           | N-Me-Ile       | Gly            | N-Me-Ala       |

**Figure S-2:** Structures of six rapafucin compounds

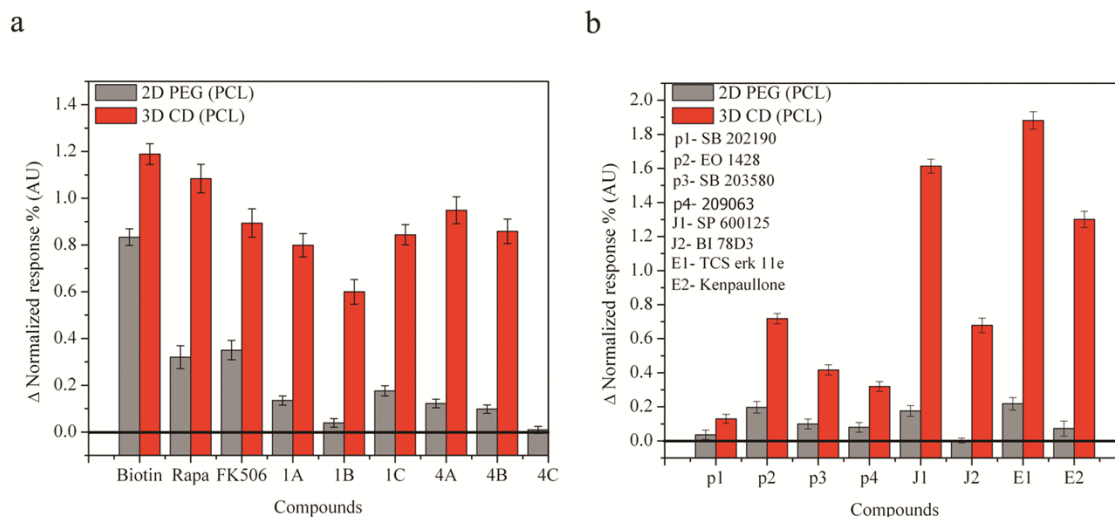

**Figure S-3:** Comparison of all compounds interaction on 2D and 3D photo-cross-linked surface by SPRi (a) response with standard deviation from 3 different slides of FKBP binding ligands and (b) all kinase inhibitors used in this study.

| Surface             | C%     | O%     | S%    | N%    | F%    |
|---------------------|--------|--------|-------|-------|-------|
| <b>2D PEG (PCL)</b> | 61.898 | 29.325 | 3.087 | 2.702 | 2.989 |
| <b>3D CD (PCL)</b>  | 60.008 | 24.753 | 4.523 | 6.717 | 3.999 |

**Table S-1:** Table representing atomic concentration characterized by X-ray photoelectron spectroscopy

| Compounds        | Ka(1/Ms)           | Kd(1/s)               | KA(1/M)            | KD(M)                 |
|------------------|--------------------|-----------------------|--------------------|-----------------------|
| <b>Rapamycin</b> | $6.65 \times 10^4$ | $1.16 \times 10^{-3}$ | $5.73 \times 10^7$ | $1.75 \times 10^{-8}$ |
| <b>FK506</b>     | $7.59 \times 10^4$ | $2.02 \times 10^{-3}$ | $3.77 \times 10^7$ | $2.66 \times 10^{-8}$ |
| <b>1A</b>        | $1.25 \times 10^4$ | 0.024                 | $5.2 \times 10^5$  | $1.92 \times 10^{-6}$ |
| <b>1B</b>        | $7.52 \times 10^3$ | 0.0291                | $2.59 \times 10^5$ | $3.87 \times 10^{-6}$ |
| <b>1C</b>        | $8.16 \times 10^3$ | 0.0177                | $4.6 \times 10^5$  | $2.17 \times 10^{-6}$ |
| <b>4A</b>        | $1.87 \times 10^3$ | 0.0147                | $1.27 \times 10^5$ | $7.85 \times 10^{-6}$ |
| <b>4B</b>        | $6.4 \times 10^3$  | 0.0149                | $4.31 \times 10^5$ | $2.32 \times 10^{-6}$ |
| <b>4C</b>        | -                  | -                     | -                  | -                     |

**Table S-2:** Table showing kinetic parameters of FKBP12 binding ligands produced from 2D PCL slides.

| Compounds        | Ka(1/Ms)           | Kd(1/s)               | KA(1/M)            | KD(M)                 |
|------------------|--------------------|-----------------------|--------------------|-----------------------|
| <b>Rapamycin</b> | $6.09 \times 10^4$ | $2.22 \times 10^{-4}$ | $2.74 \times 10^8$ | $3.65 \times 10^{-9}$ |
| <b>FK506</b>     | $5.21 \times 10^4$ | $3.87 \times 10^{-4}$ | $1.35 \times 10^8$ | $7.42 \times 10^{-9}$ |
| <b>1A</b>        | $4.95 \times 10^4$ | $2.72 \times 10^{-3}$ | $1.82 \times 10^7$ | $5.51 \times 10^{-8}$ |
| <b>1B</b>        | $6.93 \times 10^4$ | $4.32 \times 10^{-3}$ | $1.61 \times 10^7$ | $6.23 \times 10^{-8}$ |
| <b>1C</b>        | $5.87 \times 10^4$ | $4.71 \times 10^{-3}$ | $1.25 \times 10^7$ | $8.03 \times 10^{-8}$ |
| <b>4A</b>        | $5.41 \times 10^4$ | $4.95 \times 10^{-3}$ | $1.09 \times 10^7$ | $9.16 \times 10^{-8}$ |
| <b>4B</b>        | $3.54 \times 10^4$ | $8.49 \times 10^{-3}$ | $4.17 \times 10^6$ | $2.4 \times 10^{-7}$  |
| <b>4C</b>        | $5.4 \times 10^4$  | $5.1 \times 10^{-3}$  | $1.06 \times 10^7$ | $9.45 \times 10^{-8}$ |

**Table S-3:** Table showing kinetic parameters of FKBP12 binding ligands produced from 3D PCL slides.

| Compounds          | Ka                 | Kd                    | KA                 | KD                    |
|--------------------|--------------------|-----------------------|--------------------|-----------------------|
| <b>SB 239063</b>   | $6.65 \times 10^3$ | $1.76 \times 10^{-4}$ | $3.78 \times 10^7$ | $2.65 \times 10^{-8}$ |
| <b>SB 202190</b>   | $7.49 \times 10^3$ | $2.41 \times 10^{-4}$ | $3.1 \times 10^7$  | $3.22 \times 10^{-8}$ |
| <b>SB 203580</b>   | $2.9 \times 10^3$  | $4.23 \times 10^{-4}$ | $6.85 \times 10^6$ | $1.46 \times 10^{-7}$ |
| <b>EO 1428</b>     | $2.9 \times 10^3$  | $2.3 \times 10^{-4}$  | $1.26 \times 10^7$ | $7.92 \times 10^{-8}$ |
| <b>SP600125</b>    | $6.96 \times 10^3$ | $8.18 \times 10^{-4}$ | $8.51 \times 10^6$ | $1.18 \times 10^{-7}$ |
| <b>BI 78D3</b>     | $5.15 \times 10^3$ | $5.49 \times 10^{-4}$ | $9.37 \times 10^6$ | $1.07 \times 10^{-7}$ |
| <b>TCS erk 11e</b> | $1.4 \times 10^4$  | $1.01 \times 10^{-3}$ | $1.38 \times 10^7$ | $7.23 \times 10^{-8}$ |
| <b>Kenpaullone</b> | $9.94 \times 10^3$ | $7.35 \times 10^{-4}$ | $1.35 \times 10^7$ | $7.4 \times 10^{-8}$  |

**Table S-4:** Table showing kinetic parameters of kinase inhibitors against their relative targets ligands produced from 2D PCL slides.
